# Supplementary material
Source: PubMed Central journal article supplement (PMC4934661)

## Supplementary Online Content

Rivera-Hernandez M, Leyva B, Keohane LM, Trivedi AN. Quality of care for white and Hispanic Medicare Advantage enrollees in the United States and Puerto Rico. *JAMA Intern Med*. Published online April 25, 2016. doi:10.1001/jamainternmed.2016.0267.

**eTable 1.** Descriptions of Health Care Data and Information Set Quality Measures

**eTable 2.** Performance Rates for Hispanic Medicare Advantage Enrollees by Residence in Puerto Rico and the 5 States With the Highest Population of Hispanic Enrollees

**eTable 3.** Performance Rates for US White, US Hispanic, and Puerto Rican Hispanic Enrollees in For-Profit Medicare Advantage Plans

**eFigure.** Flow Chart of the Study Sample

This supplementary material has been provided by the authors to give readers additional information about their work.

**eTable 1. Descriptions of Health Care Data and Information Set Quality Measures**

| Measure                              | Type of Measure | Description                                                                                                                                                                                                                                                                                                                                                                                                                                                                                                                    |
|--------------------------------------|-----------------|--------------------------------------------------------------------------------------------------------------------------------------------------------------------------------------------------------------------------------------------------------------------------------------------------------------------------------------------------------------------------------------------------------------------------------------------------------------------------------------------------------------------------------|
| <i>Comprehensive diabetes care</i>   |                 |                                                                                                                                                                                                                                                                                                                                                                                                                                                                                                                                |
| Annual HbA1c testing                 | Process         | Percentage of members 18 to 75 years of age with diabetes who had a hemoglobin A1c (HbA1c) test performed during the measurement year.                                                                                                                                                                                                                                                                                                                                                                                         |
| HbA1c >9%                            | Outcome         | Percentage of members 18 to 75 years of age with diabetes whose most recent hemoglobin A1c (HbA1c) level is greater than 9.0% (poorly controlled).                                                                                                                                                                                                                                                                                                                                                                             |
| Retinal exam performed               | Process         | Percentage of members 18 to 75 years of age with diabetes who had an eye screening for diabetic retinal disease.                                                                                                                                                                                                                                                                                                                                                                                                               |
| Annual LDL-C screening               | Process         | Percentage of members 18–75 years of age with diabetes who had LDL-C screening                                                                                                                                                                                                                                                                                                                                                                                                                                                 |
| LDL-C control <100mg/dL              | Outcome         | Percentage of members 18–75 years of age with diabetes (type 1 and type 2) who had LDL-C control (<100 mg/dL)                                                                                                                                                                                                                                                                                                                                                                                                                  |
| Nephropathy screening                | Process         | Percentage of members 18 to 75 years of age with diabetes who had a nephropathy screening test or evidence of nephropathy.                                                                                                                                                                                                                                                                                                                                                                                                     |
| Blood pressure control <140/90 mm Hg | Outcome         | Percentage of members 18 to 75 years of age with diabetes whose most recent blood pressure (BP) reading is less than 140/90 mm Hg during the measurement year.                                                                                                                                                                                                                                                                                                                                                                 |
| <i>Cardiovascular care</i>           |                 |                                                                                                                                                                                                                                                                                                                                                                                                                                                                                                                                |
| LDL-C testing after coronary event   | Process         | Percentage of members 18 through 75 years of age who were discharged alive for acute myocardial infarction (AMI), coronary artery bypass graft (CABG), or percutaneous coronary interventions (PCI) from January 1 through November 1 of the year prior to the measurement year, <i>or</i> who had a diagnosis of ischemic vascular disease (IVD) during the measurement year and the year prior to the measurement year, who had low-density lipoprotein cholesterol (LDL-C) screening performed during the measurement year. |

**eTable 1. Descriptions of Health Care Data and Information Set Quality Measures (Continued)**

| Measure                                             | Type of Measure | Description                                                                                                                                                                                                                                                                                                                                                                                                                                                                                                                                                                                                                                                                                |
|-----------------------------------------------------|-----------------|--------------------------------------------------------------------------------------------------------------------------------------------------------------------------------------------------------------------------------------------------------------------------------------------------------------------------------------------------------------------------------------------------------------------------------------------------------------------------------------------------------------------------------------------------------------------------------------------------------------------------------------------------------------------------------------------|
| <i>Cardiovascular care</i>                          |                 |                                                                                                                                                                                                                                                                                                                                                                                                                                                                                                                                                                                                                                                                                            |
| LDL-C <100 mg/dL after coronary event               | Outcome         | <p>This measure is used to assess the percentage of members 18 through 75 years of age who were discharged alive for acute myocardial infarction (AMI), coronary artery bypass graft (CABG), or percutaneous coronary interventions (PCI) from January 1 through November 1 of the year prior to the measurement year, or who had a diagnosis of ischemic vascular disease (IVD) during the measurement year and the year prior to the measurement year, who had each of the following during the measurement year:</p> <ul style="list-style-type: none"> <li>• Low-density lipoprotein cholesterol (LDL-C) screening performed</li> <li>• LDL-C control (less than 100 mg/dL)</li> </ul> |
| Blood pressure control <140/90 mmHg in hypertension | Outcome         | <p>Percentage of members 18 to 85 years of age who had a diagnosis of hypertension and whose blood pressure (BP) was adequately controlled during the measurement year based on the following criteria:</p> <ul style="list-style-type: none"> <li>• Members 18 to 59 years of age whose BP was less than 140/90 mm Hg</li> <li>• Members 60 to 85 years of age with a diagnosis of diabetes whose BP was less than 140/90 mm Hg</li> <li>• Members 60 to 85 years of age without a diagnosis of diabetes whose BP was less than 150/90 mm Hg</li> </ul>                                                                                                                                   |
| Beta-blocker treatment after myocardial infarction  | Process         | <p>Percentage of members 18 years of age and older during the measurement year who were hospitalized and discharged from July 1 of the year prior to the measurement year to June 30 of the measurement year with a diagnosis of acute myocardial infarction (AMI) and who received persistent beta-blocker treatment for six months after discharge.</p>                                                                                                                                                                                                                                                                                                                                  |
| <i>Appropriate drug use</i>                         |                 |                                                                                                                                                                                                                                                                                                                                                                                                                                                                                                                                                                                                                                                                                            |
| Receipt of 1 or more high-risk medications          | Process         | <p>Percentage of members 66 years of age and older who received at least one high-risk medication.</p>                                                                                                                                                                                                                                                                                                                                                                                                                                                                                                                                                                                     |

**eTable 1. Descriptions of Health Care Data and Information Set Quality Measures (Continued)**

| Measure                                              | Type of Measure | Description                                                                                                                                                                                                                                                                                                                    |
|------------------------------------------------------|-----------------|--------------------------------------------------------------------------------------------------------------------------------------------------------------------------------------------------------------------------------------------------------------------------------------------------------------------------------|
| <i>Appropriate drug use</i>                          |                 |                                                                                                                                                                                                                                                                                                                                |
| Use of disease-modifying anti-rheumatic drug therapy | Process         | Percentage of members who were diagnosed with rheumatoid arthritis and who were dispensed at least one ambulatory prescription for a disease modifying anti-rheumatic drug (DMARD).                                                                                                                                            |
| Use of systemic corticosteroid in COPD exacerbation  | Process         | Percentage of chronic obstructive pulmonary disease (COPD) exacerbations for members 40 years of age and older who had an acute inpatient discharge or emergency department (ED) visit between January 1 and November 30 of the measurement year and who were dispensed a systemic corticosteroid within 14 days of the event. |
| Use of bronchodilator therapy in COPD exacerbation   | Process         | Percentage of chronic obstructive pulmonary disease (COPD) exacerbations for members 40 years of age and older who had an acute inpatient discharge or emergency department (ED) visit on or between January 1 and November 30 of the measurement year and who were dispensed a bronchodilator within 30 days of the event.    |
| <i>Cancer screening</i>                              |                 |                                                                                                                                                                                                                                                                                                                                |
| Colorectal cancer screening                          | Process         | Percentage of patients 50 to 75 years of age who had appropriate screening for colorectal cancer                                                                                                                                                                                                                               |
| Breast cancer screening                              | Process         | Percentage of women 50 to 74 years of age who had a mammogram to screen for breast cancer                                                                                                                                                                                                                                      |

**eTable 2. Performance Rates for Hispanic Medicare Advantage Enrollees by Residence in Puerto Rico and the 5 States With the Highest Population of Hispanic Enrollees**

|                                                                 | PR   | CA                | AZ                | FL                | NY                | TX                |
|-----------------------------------------------------------------|------|-------------------|-------------------|-------------------|-------------------|-------------------|
| <i>Comprehensive diabetes care</i>                              |      |                   |                   |                   |                   |                   |
| Annual HbA1c testing (N=22,789)                                 | 84.5 | 92.9 <sup>b</sup> | 93.3 <sup>b</sup> | 93.1 <sup>b</sup> | 91.2 <sup>b</sup> | 90.9 <sup>b</sup> |
| HbA1c >9% (N=22,788)                                            | 47.5 | 21.1 <sup>b</sup> | 25.4 <sup>b</sup> | 17.9 <sup>b</sup> | 29.4 <sup>b</sup> | 39.9 <sup>b</sup> |
| Retinal eye exam (N=22,718)                                     | 55.0 | 70.9 <sup>b</sup> | 65.2 <sup>b</sup> | 65.5 <sup>b</sup> | 71.6 <sup>b</sup> | 57.0              |
| Annual LDL-C testing (N=23,074)                                 | 90.9 | 91.1              | 89.3              | 95.0 <sup>b</sup> | 91.3              | 89.0 <sup>b</sup> |
| LDL-C <100 mg/dL (N=23,073)                                     | 36.5 | 56.4 <sup>b</sup> | 53.3 <sup>b</sup> | 55.6 <sup>b</sup> | 52.7 <sup>b</sup> | 46.9 <sup>b</sup> |
| Nephropathy screening (N=25,368)                                | 87.5 | 94.0 <sup>b</sup> | 93.6 <sup>b</sup> | 91.2 <sup>b</sup> | 91.9 <sup>b</sup> | 93.2 <sup>b</sup> |
| Blood pressure control <140/90 mm Hg (N=18,138)                 | 56.4 | 60.8 <sup>b</sup> | 60.7 <sup>b</sup> | 53.1 <sup>b</sup> | 58.4              | 53.7 <sup>a</sup> |
| <i>Cardiovascular care</i>                                      |      |                   |                   |                   |                   |                   |
| LDL-C testing after coronary event (N=17,071)                   | 91.6 | 96.2 <sup>b</sup> | 89.4              | 95.7 <sup>b</sup> | 94.7 <sup>b</sup> | 90.7              |
| LDL-C <100 mg/dL after coronary event (N=17,071)                | 37.5 | 77.1 <sup>b</sup> | 56.8 <sup>b</sup> | 56.0 <sup>b</sup> | 55.0 <sup>b</sup> | 53.0 <sup>b</sup> |
| Blood pressure control <140/90 mmHg in hypertension (N= 14,268) | 56.1 | 62.3 <sup>b</sup> | 61.0 <sup>b</sup> | 65.6 <sup>b</sup> | 60.9 <sup>b</sup> | 56.7              |
| Beta-blocker treatment after myocardial infarction (N=4,299)    | 78.4 | 89.1 <sup>b</sup> | 85.5 <sup>a</sup> | 90.3 <sup>b</sup> | 89.7 <sup>b</sup> | 79.6              |
| <i>Appropriate drug use</i>                                     |      |                   |                   |                   |                   |                   |
| Receipt of 1 or more high-risk-medications (N=926,799)          | 24.2 | 14.8 <sup>b</sup> | 20.6 <sup>b</sup> | 25.7 <sup>b</sup> | 15.9 <sup>b</sup> | 22.1 <sup>b</sup> |
| Use of disease-modifying anti-rheumatic drug therapy (N=13,440) | 40.0 | 75.4 <sup>b</sup> | 76.7 <sup>b</sup> | 66.1 <sup>b</sup> | 68.4 <sup>b</sup> | 66.0 <sup>b</sup> |
| Use of systemic corticosteroid in COPD exacerbation (N=4,743)   | 37.7 | 64.3 <sup>b</sup> | 62.9 <sup>b</sup> | 59.3 <sup>b</sup> | 62.2 <sup>b</sup> | 52.2 <sup>b</sup> |
| Use of bronchodilator therapy in COPD exacerbation (N=4,743)    | 52.9 | 82.3 <sup>b</sup> | 80.6 <sup>b</sup> | 79.9 <sup>b</sup> | 79.2 <sup>b</sup> | 68.0 <sup>b</sup> |
| <i>Cancer screening</i>                                         |      |                   |                   |                   |                   |                   |
| Colorectal (N=16,513)                                           | 59.0 | 60.8              | 52.4 <sup>b</sup> | 62.2 <sup>a</sup> | 60.4              | 45.0 <sup>b</sup> |
| Breast (N=84,343)                                               | 72.3 | 85.5 <sup>b</sup> | 73.7              | 84.7 <sup>b</sup> | 78.9 <sup>b</sup> | 70.1 <sup>b</sup> |

Abbreviations: HbA1c, glycosylated hemoglobin; LDL-C, low-density lipoprotein cholesterol; mg/dL, milligrams per deciliter; mmHG, millimeters of mercury; COPD, chronic obstructive pulmonary disease; PR, Puerto Rico; CA, California; AZ, Arizona; FL, Florida; NY, New York; TX, Texas.

<sup>a</sup> indicates the rate for Hispanic enrollees in PR and the corresponding group is significantly different at  $p < .05$

<sup>b</sup> indicates the rate for Hispanic enrollees in PR and the corresponding group is significantly different at  $p < .01$

**eTable 3.** Performance Rates for US White, US Hispanic, and Puerto Rican Hispanic Enrollees in For-Profit Medicare Advantage Plans

| Performance rates for-profit MA plans (%)                        |           |                   |                          |
|------------------------------------------------------------------|-----------|-------------------|--------------------------|
|                                                                  | US whites | US Hispanics      | Hispanics in Puerto Rico |
| <i>Comprehensive diabetes care</i>                               |           |                   |                          |
| Annual HbA1c testing (N= 103,088)                                | 91.6      | 92.0              | 84.5 <sup>d</sup>        |
| HbA1c >9% (N= 103,033)                                           | 27.9      | 27.7              | 47.5 <sup>d</sup>        |
| Retinal eye exam (N= 102,793)                                    | 63.7      | 65.2 <sup>b</sup> | 55.0 <sup>d</sup>        |
| Annual LDL-C testing (N= 103,546)                                | 88.1      | 90.1 <sup>b</sup> | 90.9                     |
| LDL-C <100 mg/dL (N= 103,491)                                    | 51.8      | 52.0              | 36.5 <sup>d</sup>        |
| Nephropathy screening (N= 105,667)                               | 89.1      | 92.7 <sup>b</sup> | 87.5 <sup>d</sup>        |
| Blood pressure control <140/90 mmHg (N= 95,014)                  | 58.2      | 56.9 <sup>a</sup> | 56.4                     |
| <i>Cardiovascular care</i>                                       |           |                   |                          |
| LDL-C testing after coronary event (N= 75,343)                   | 89.3      | 92.2 <sup>b</sup> | 91.6                     |
| LDL-C <100 mg/dL after coronary event (N= 75,343)                | 58.3      | 56.2 <sup>b</sup> | 37.5 <sup>d</sup>        |
| Blood pressure control <140/90 mmHg in hypertension (N= 88,573)  | 63.5      | 60.7 <sup>b</sup> | 56.1 <sup>d</sup>        |
| Beta-blocker treatment after myocardial infarction (N= 21,684)   | 88.1      | 86.3 <sup>a</sup> | 78.4 <sup>d</sup>        |
| <i>Appropriate drug use</i>                                      |           |                   |                          |
| Receipt of 1 or more high-risk-medications (N= 4,700,777)        | 18.2      | 21.3 <sup>b</sup> | 24.2 <sup>d</sup>        |
| Use of disease-modifying anti-rheumatic drug therapy (N= 56,266) | 74.5      | 68.3 <sup>b</sup> | 39.9 <sup>d</sup>        |
| Use of systemic corticosteroid in COPD exacerbation (N= 36,907)  | 66.9      | 59.7 <sup>b</sup> | 37.7 <sup>d</sup>        |
| Use of bronchodilator therapy in COPD exacerbation (N= 36,907)   | 75.0      | 77.7 <sup>a</sup> | 52.9 <sup>d</sup>        |
| <i>Cancer screening</i>                                          |           |                   |                          |
| Colorectal (N=158,646)                                           | 60.3      | 53.7 <sup>b</sup> | 59.0 <sup>d</sup>        |
| Breast (N= 418,452)                                              | 70.6      | 76.2 <sup>b</sup> | 72.3 <sup>d</sup>        |

Abbreviations: HbA1c, glycosylated hemoglobin; LDL-C, low-density lipoprotein cholesterol; mg/dL, milligrams per deciliter; mmHG, millimeters of mercury; COPD, chronic obstructive pulmonary disease.

<sup>a</sup> indicates the difference in the rate for white enrollees vs. that of Hispanic enrollees in the US is significant at  $p < 0.05$

<sup>b</sup> indicates the difference in the rate for white enrollees vs. that of Hispanic enrollees in the US is significant at  $p < 0.01$

<sup>c</sup> indicates the difference in the rate for Hispanic enrollees in the US vs. that of Hispanic enrollees in Puerto Rico is significant at  $p < 0.05$

<sup>d</sup> indicates the difference in the rate for Hispanic enrollees in the US vs. that of Hispanic enrollees in Puerto Rico is significant at  $p < 0.01$

**eFigure. Flow Chart of the Study Sample**

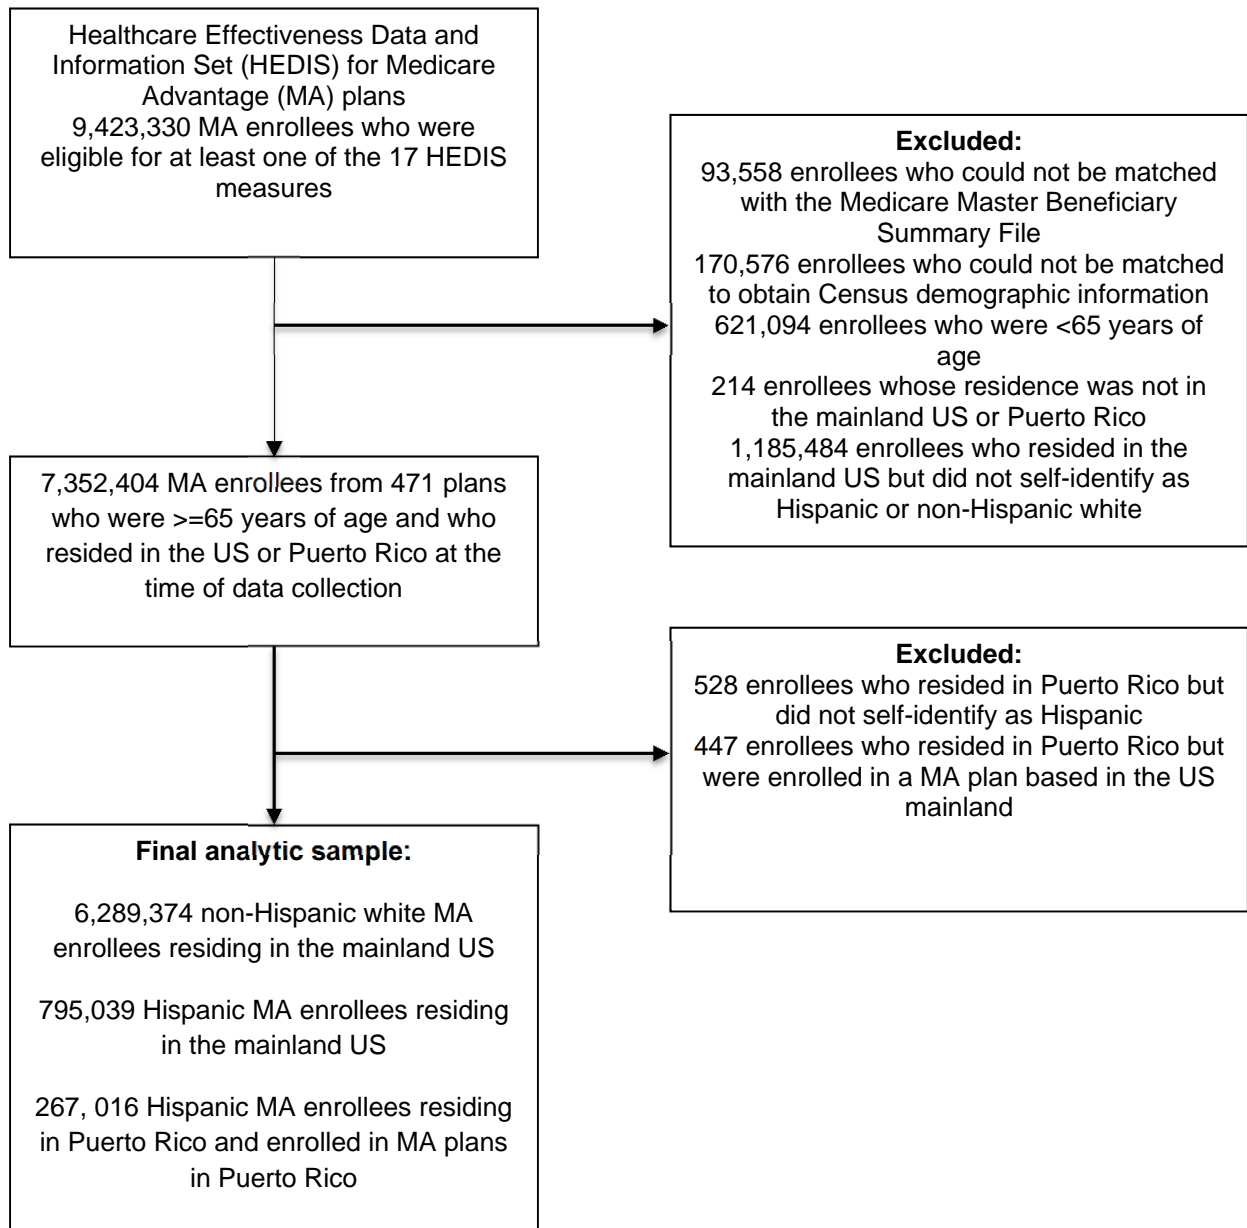

Supplement: NIHMS797343-supplement-Supplement.pdf [file NIHMS797343-supplement-Supplement.pdf]
